# Supplementary material for: Structure and surface analyses of a newly synthesized acyl thiourea derivative along with its in silico and in vitro investigations for RNR, DNA binding, urease inhibition and radical scavenging activities
Source: Royal Society of Chemistry journal article supplement (doi:10.1039/d2ra03160d), 2022-01-01
Supplement: d2ra03160d1.xlsx [file d2ra03160d1.xlsx]

## Sheet: Sheet1
				Crystal µM	% inhibition
				0.0925926	86.9999
				0.0462963	80.1523
				0.0231481	70.6497
				0.0115741	61.1364
				0.00578704	51.6393
				0.00289352	54.8599
				0.00144676	54.3066
				0.00072338	47.9936
				Standard µM	% inhibition
				54.74	74.4546
				27.37	70.0416
				13.685	60.3844
				6.8425	58.8566
				3.42125	53.8708
				1.71063	50.4932
				0.855313	49.7947
				0.427656	47.0968
