# Supplementary figures and images for: Structure and surface analyses of a newly synthesized acyl thiourea derivative along with its in silico and in vitro investigations for RNR, DNA binding, urease inhibition and radical scavenging activities
Source: Royal Society of Chemistry journal article supplement (doi:10.1039/d2ra03160d), 2022-01-01

## IC<sub>50</sub> Graphs of Crystal (Compound 4)

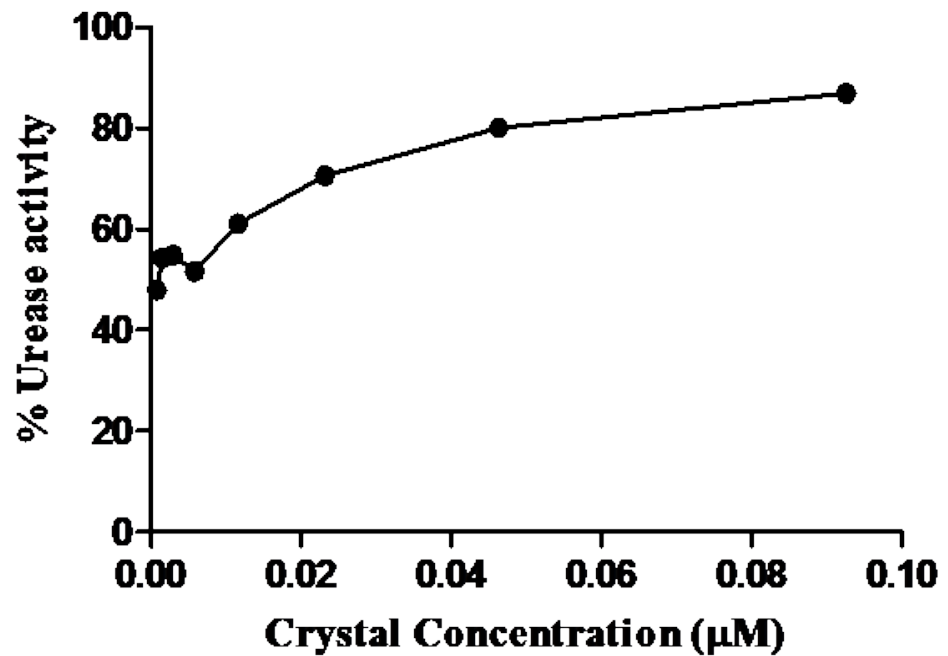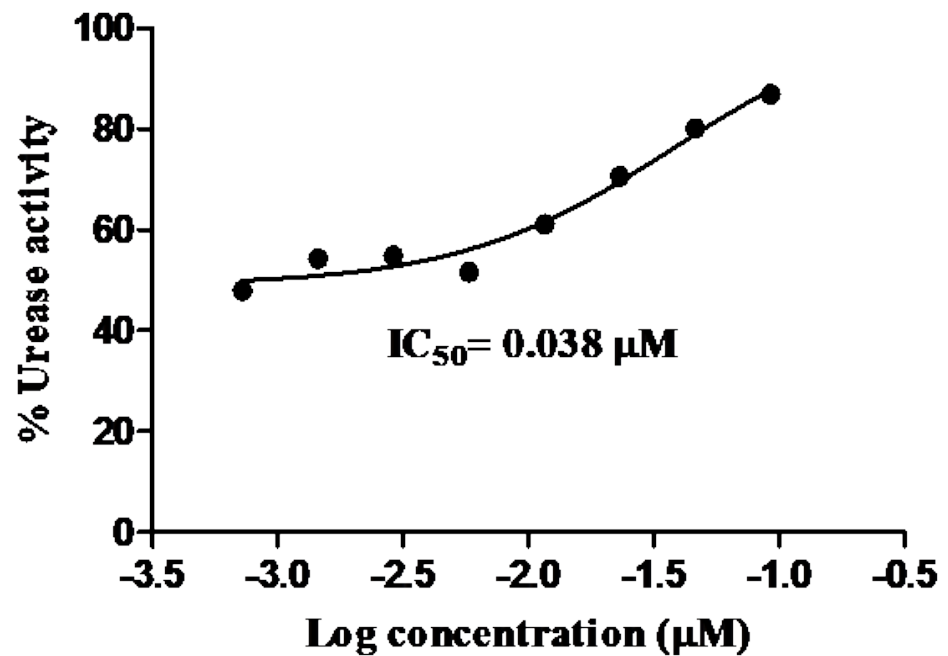

## IC<sub>50</sub> Graphs of Thiourea (Standard Inhibitor)

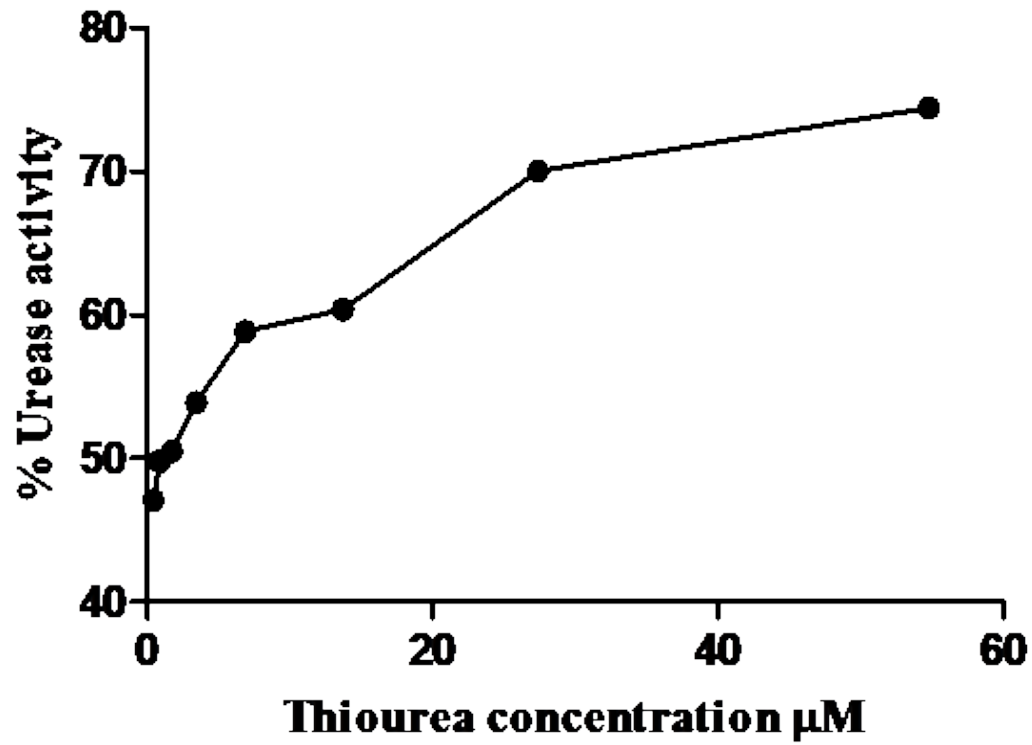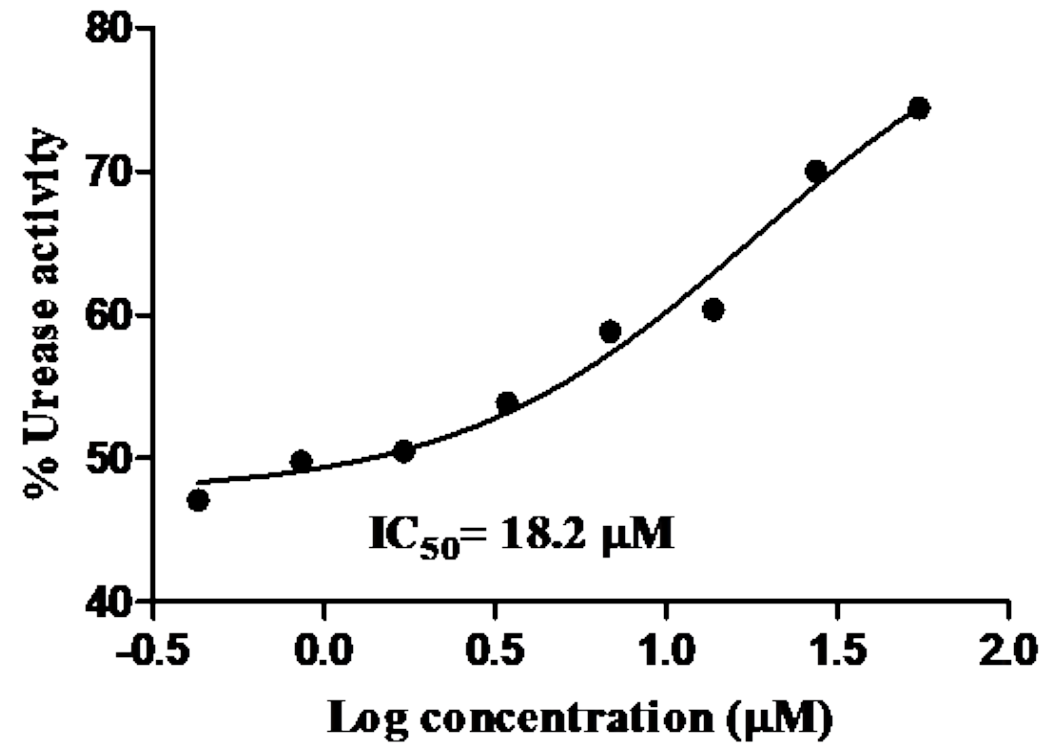

Supplement: d2ra03160d2.pdf [file d2ra03160d2.pdf]
